# Supplementary material
Source: PubMed Central journal article supplement (PMC2890112)
Supplement: mt201044x5.pdf [file mt201044x5.pdf]

| Type of Tumor         | Patient Age | Patient Gender | Pathology of Sample                                         |
|-----------------------|-------------|----------------|-------------------------------------------------------------|
| Brain tumour#1        | n/a         | n/a            | not available                                               |
| Brain tumour#2        | 78          | M              | glioblastoma multiforme                                     |
| Brain tumour#3        | 63          | F              | glioblastoma multiforme                                     |
| Brain tumour#4        | 46          | M              | anaplastic oligodendroglioma                                |
| Brain tumour#5        | 76          | F              | glioblastoma multiforme                                     |
| Breast tumour#1       | n/a         | F              | not available                                               |
| Lung tumour#1         | 70          | M              | moderately differentiated squamous cell carcinoma of lung   |
| Lung tumour#2         | 68          | M              | moderately differentiated squamous cell carcinoma of lung   |
| Lung tumour#3         | n/a         | M              | moderately differentiated squamous cell carcinoma of lung   |
| Colon tumour#1        | 90          | F              | well differentiated adenocarcinoma of the colon             |
| Colon tumour#2        | 55          | M              | well differentiated adenocarcinoma of the colon             |
| Colon tumour#3        | 63          | F              | mucinous adenocarcinoma of the colon                        |
| Colon tumour#4        | 69          | M              | adenocarcinoma of the colon                                 |
| Colon tumour#5        | 67          | F              | moderately differentiated adenocarcinoma of colon           |
| Colon tumour#6        | n/a         | M              | metastatic adenocarcinoma of the colon                      |
| Rectal tumour#1       | n/a         | M              | moderately differentiated adenocarcinoma of the rectum      |
| Rectal tumour#2       | 74          | M              | well differentiated adenocarcinoma of the colon             |
| Rectal tumour#3       | 54          | M              | poorly differentiated adenocarcinoma of the colon           |
| Rectal tumour#4       | 80          | M              | adenocarcinoma of the rectosigmoid                          |
| Endometrial tumour#1  | 63          | F              | FIGO Grade 2 endometrioid adenocarcinoma                    |
| Endometrial tumour#2  | 70          | F              | FIGO Grade 1 endometrioid adenocarcinoma                    |
| Endometrial tumour#3  | 66          | F              | FIGO Grade 1 endometrioid adenocarcinoma                    |
| Endometrial tumour#4  | 52          | F              | FIGO Grade 1 endometrioid adenocarcinoma                    |
| Endometrial tumour#5  | 55          | F              | FIGO Grade 2/3 endometrioid adenocarcinoma                  |
| Endometrial tumour#6  | 85          | F              | FIGO Grade 3 endometrioid adenocarcinoma                    |
| Endometrial tumour#7  | 67          | F              | FIGO Grade 1 endometrioid adenocarcinoma                    |
| Endometrial tumour#8  | 64          | F              | FIGO Grade 1 endometrioid adenocarcinoma                    |
| Endometrial tumour#9  | 64          | F              | FIGO Grade 1 endometrioid adenocarcinoma                    |
| Endometrial tumour#10 | 71          | F              | Ovarian adenocarcinoma                                      |
| Cervical tumour#1     | 54          | F              | Poorly differentiated squamous cell carcinoma of cervix     |
| Cervical tumour#2     | 59          | F              | Poorly differentiated squamous cell carcinoma of cervix     |
| Vulvar tumour#1       | 81          | F              | Squamous cell carcinoma of the vulva                        |
| Ovarian tumour#1      | 55          | F              | FIGO Grade 3 endometrioid carcinoma                         |
| Pancreatic tumour#1   | 50          | F              | Moderately differentiated ductal adenocarcinoma of pancreas |
| Pancreatic tumour#2   | 76          | M              | Moderately differentiated ductal adenocarcinoma of pancreas |
| Renal tumour#1        | 65          | M              | renal cell carcinoma                                        |
| Sarcoma#1             | 59          | F              | Malignant fibrous histiocytoma                              |
| Sarcoma#2             | 54          | F              | Chondrosarcoma arising in osteochondroma                    |
| Sarcoma#3             | 63          | M              | Myxoid & round cell liposarcoma                             |
| Sarcoma#4             | 54          | M              | Dermatofibrosarcoma Protuberans                             |
| Sarcoma#5             | 52          | M              | Chondrosarcoma                                              |
| Sarcoma#6             | 41          | F              | Malignant fibrous histiocytoma                              |
| Sarcoma#7             | n/a         | F              | leiomyosarcoma                                              |
| Right groin tumour#1  | 68          | M              | Fibrosarcoma                                                |
